# Supplementary material
Source: publisher figshare collection journal article supplement (https://tandf.figshare.com/articles/dataset/_/22193324)
Supplement: Supplementary file 1 [file 1]

## Sheet: A-catalogue
				Maboko Bovidae					Relative abundance by Bed
									3	N=206	MNI=7
Provenience of New taxa									5w	N=31	MNI=2
Field #	Accession #		side	element	Bed	Pit	Dept below PI1		5b	N=49	MNI=3
88Mb1239	21849	Kubanotragus pickfordi		frontal w/horn core base	3	D	412		3 or 5	N=40
96Mb3604	35021	Kubanotragus pickfordi		horn core	3	163	bottom green sand		12	N=9	MNI=1
NHMUK-M	15543	Kubanotragus pickfordi		frontal with both horn cores
	9204	Kubanotragus pickfordi ?		mandible with p3-m3	6		Maboko cliffs
3862/87	20350	Kubanotragus pickfordi ?	L	mand w/ m1-m3	5w	2	whiteclay
96Mb1252	35022	Kubanotragus pickfordi ?	L	m3 (lower)	5w	192	130
92MB16	25490	Kubanotragus pickfordi ?		m3 (lower)	12		surface
248/84	20291	Kubanotragus pickfordi ?	R	Lm3 in mandible fragment	3 or 5		owens trench
92MB647	24892	Turcocerus africanus		frontal and horn core	3	65	471
93Mb1017	27599	Turcocerus africanus		horn core	3	101	509
93Mb1285	27601	Turcocerus africanus		horn core	3	93	550
93Mb399	27602	Turcocerus africanus		horn core, weathered	3	83	488
93Mb506	27603	Turcocerus africanus		Horncore	3	105	464
96Mb3945	33211	Turcocerus africanus		horn core	3	162	400
97Mb778	36684	Turcocerus africanus		horn w/ parietal	3	202	357
3867/87	20351	Turcocerus africanus		horn core frag	5w
88Mb556	21504	Turcocerus africanus		horn core	5w	51	188 below PI 1
94 Mb72	29562	Turcocerus africanus	R	frontal and horn core	5w	141	168 below IP 1
3841/87	20347	Turcocerus africanus		horn	3 or 5 surface
614'82	13827	Turcocerus africanus		horn core	3 or 5 surface Main South
	10061	Turcocerus africanus		horn core frag
NHMUK-M	M 15544	Turcocerus africanus
94Mb1057	29573	Kubanotragus pickfordi ?	L	maxilla	3	156	greensand
88Mb1224	21666	Kubanotragus pickfordi ?	L	m3 (lower)	3	D	415-425 below PI 1
4823/88	21912	Kubanotragus pickfordi ?	R	m lower	3	15	338-348 below
92MB99	25148	Kubanotragus pickfordi ?		mandible, with p3-m2	12		surface
425'83	13828	Turcocerus africanus ?		m3 lower right	3 or 5		Main South
MB 1934	548	Turcocerus africanus ?
Additional specimens
Maboko Main - Bed 3 greensand			n=206; MNI=7 based on left scaphoids and P4s
88Mb1314	21865			horn core	3	G	435
92MB740	24922			horn cone frag	3	61	458
92MB664	24931			horn core	3	64	504
92MB648	24932			horn core	3	71	476
97Mb957	36187			horn core	3	199	380
93Mb233	27598			Horncore+frontal	3	110	458
93Mb1121	27600			Horncore	3	93	536
93Mb397	27604			Horncore+frontal	3	81	478
96Mb3494	35030			horn core	3	193	376
93Mb804			L	Frontal	3	91	537
93Mb807				Horn-core	3	92	506
5557/88	20342		L	mand with m2-3	3	pit32	400 below
92MB285	24927		L	mandible, with p4-m1	3	60	432
92MB1131	25368		L	mandible symphysis	3	79	440
94Mb1009	29588		R	mandible w/ erupting M	3	150	bottom
92MB697				dp (lower)	3	66	430
92MB787	25364		R	p2 (lower)	3	78	465
92MB856				p2 (lower)	3	62	450
5531/88	20341		L	p2 lower	3	greensand	384-394 below
92MB855	25376		R	p3 or 4 (lower)	3	66	440
93Mb0159	27575		L	p4 lower	3	85	395-415
94Mb49	29581		L	p4 (lower)	3	LP	greensand
94Mb586			L	p4 (lower)	3	153	385-405 below IPI
94Mb660	29584		R	p4 (lower)	3	151	410-430 below IPI
94Mb890	29583		R	p4 (lower)	3	155	375-395 below IPI
92MB1164	25355		R	p4 (lower)	3	69	460
92MB1404	25494		R	p4 (lower)	3	75	410
92MB416	25353		R	p4 (lower)	3	60	435
94Mb954	29585			p4 lower	3	153	435-455
93Mb1076	27573		L	p4 lower	3	90	510-520
93Mb0507	27574		R	p4 lower	3	111	520
92MB704			L	p (lower)	3	76	430
96Mb2908	no pg		L	p (lower)	3	169	360
88Mb1211	21452		R	p (lower)	3	G	425-435 below PI 1
88Mb1218	21486		R	p (lower)	3	G	480-490 below PI 1
92MB1132	25356			p (lower)	3	61	480
92MB689				p (lower)	3	77	470
96Mb3804	35024		R	p (lower)	3	178	340
94Mb781	29590		R	m1 or 2 (lower)	3	160	375-395 below IPI
92MB944	24929		R	m1 or 2 (lower)	3	63	480
92MB967	24924			m1 or 2 (lower)	3	69	482
92MB691			R	m3 (lower)	3	64	460
92MB567	25354			m3 (lower)	3	79	370
94Mb186	29591		R	m3 lower distal frag	3	128	425-470
92MB1006	24925		R	m (lower)	3	73	450
92MB696	29568			m (lower)	3	60	455
92MB785	24923			m (lower)	3	66	440
93Mb0958				dI (upper)	3	89	520-530
97Mb814	36160		R	DP2 (upper)	3	200	360
92MB454				DP2 (upper)	3	70	405
92MB688				I	3	66	430
92MB695				I	3	77	450
93Mb586			R	P2 upper	3	82	470-480
93Mb585	27572		R	P2 upper	3	pit 82	470-480
96Mb3283	35029		L	P3 (upper)	3	165	395
94Mb737	29564		R	P3 (upper)	3	157	395-415 below IPI
9xMB1403				P3 (upper)	3	65	480
92MB786	25374			P3 (upper)	3	65	483
94Mb1035	29563		R	P3 upper	3	155	greensand
94Mb968	29565			P3 upper	3	157	415-435
94Mb253	29567		R	P4 (upper)	3	LP	405-425
94Mb696			R	P4 (upper)	3	150	390-410 below IPI
94Mb661	29566			P4 (upper)	3	151	410-430 below IPI
93Mb0978	27577			P4 upper	3	103	480-490
94Mb659	29574		R	M1 or 2 (upper)	3	151	410-430 below IPI
93Mb0310	27570		L	M1 upper	3	100	420-450
92MB946	25492		L	M3 (upper)	3	72	420
92MB698				M germ	3	64	460
92MB1279	25495		L	M (upper)	3	73	480
92MB1283	25372		L	M (upper)	3	65
94Mb750	29706		R	M (upper)	3	158	335-355 below IPI
92MB1183	24920			M (upper)	3	67	440
92MB495	24926		L	M (upper)	3	61	433
88Mb895	21537			M (upper)	3	B	420-430 below PI 1
92MB751	25875			M (upper)	3	63	471
94Mb137	29575			M upper	3	113	340-365
94Mb359	29578			M upper	3	113	435-455
94Mb428	29569		L	M upper	3	LP	430-450 below IPI
93Mb957			L	M upper	3	89	520-530
94Mb843	29577		R	M upper	3	153	420-440 below IPI
94Mb194	29576			M upper	3	LP	395-425 below IPI
94Mb307	29572			M upper	3	LP	425-445 below IPI
94Mb785	29571			M upper	3	151	390-430 below IPI
93Mb0222	27569			M upper	3	110	430-440
93Mb1054	27570			M upper	3	90	490-500
4731/88	20345		R	M upper	3
92MB1403	25491			P3	3	65	480-490
94Mb360	29582		L	P4	3	123	425-455
94Mb950	29589		R	M1 or 2	3	153	435-455 below IPI
93Mb896				vertebra lumbar	3	103	491
93Mb425				vertebra thoracic	3	86	481
97Mb804	36181		l	humerus, proximal	3	202	351
92MB1402	25351		R	radius distal	3	68	500
92MB557	25874		L	radius distal	3	79	419
93Mb0773	27584		R	radius distal	3	95	490-500
93Mb1176	27605		R	radius proximal	3	101	505-515
93Mb481	27589		R	cuneiform lateral-carpus	3	85	445-465 below
93Mb0480				cuneiform lateral-carpus	3	85	445-465
93Mb0840	27595		R	cuneiform lateral-carpus	3	83	530-540
92MB447	25144		R	lunate	3	60	420
92MB328	25370		L	lunate	3	71	451
93Mb0776	27583		L	lunate	3	83	500-510
94Mb489	29593		R	lunate	3	153	375-395 below IPI
93Mb0594			R	lunate	3	90	480-490
4699/88	20343		R	magnum	3
5570/88	20344		R	magnum	3	26	440 below
92MB566	25369		l	magnum	3	64	497
93Mb1027	27568		L	magnum	3	82	490-500
92MB699			R	magnum	3	61	430
92MB565	25357		R	pisiform	3	63	461
92MB1033	25496		R	pisiform	3	61	450
93Mb1208	27562			Pisiform	3	80	515-525
93Mb1195	27563			Pisiform	3	LP	340-390
93Mb1038	27564			Pisiform	3	86	520-530
92MB703			L	pisiform	3	73	440
92MB1408	25360		R	scaphoid	3	72	460
92MB327	25367		L	scaphoid	3	66	422
92MB687	25373		L	scaphoid	3	66	430
93Mb0395	27581		R	Scaphoid	3	83	475-485
93Mb0757	27585		L	Scaphoid	3	92	460-470
93Mb0931	27594		L	Scaphoid	3	82	490-500
93Mb0784	27596		L	Scaphoid	3	105	450-460
94Mb548	29592		L	scaphoid	3	152	350-370 below IPI
4659/88	20338		L	scaphoid	3
92MB694	25365		R	unciform	3	64	460
94Mb652	29595			unciform	3	150	390-410
92MB823	24921		L	metacarpal 3/4	3	63	470
92MB564	24933		L	metacarpal 3/4	3	60	456
94Mb1042	29596		L	metacarpal 3/4 proximal end	3	155	greensand
92MB483	24904			metacarpal 3/4 distal	3	65	397
94Mb1025	29597		R	metacarpal 3/4 distal	3	152	greensand
93Mb0650	28505			pubis	3	101	492
94Mb672	29709			sacrum	3	150	404 below
92MB824	25876		L	illium	3	79	412
92MB452	29586			femoral head	3	68	439
92MB419	24906		R	femur	3	73	432
92MB945	25362		R	femur distal	3	67	471
94Mb154	29710		L	femur, prox	3	127	410-435
92MB1401	25371		R	patella	3	64
97Mb950	36186			patella	3	202	345
94Mb639	29598		L	patella proximal end	3	150	398 below IPI
94Mb1001	29599		L	patella proximal end	3	150	bottom of greensand
4821/88	20339		R	fibula	3
92MB226	25143		L	fibula	3	62	355
92MB497	25348		R	fibula	3	68	440
93Mb0658	27588		R	fibula	3	80	455-465
93Mb1134	27590		L	fibula	3	82	510-520
92MB470	25350		R	tibia distal	3	79	415
92MB468	25359		L	tibia distal	3	77	454
93Mb1056	27582		R	tibia distal	3	91	525-535
94Mb595	29708		L	tibia distal	3	159	315-335 below IPI
88Mb949	21587			astragalus	3	A	414
92MB451	25147		R	astragalus	3	71	459
92Mb 619	25388		L	astragalus	3	70	473
93Mb961	27565			astragalus	3	89	500-510 below
94Mb749	27566		L	astragalus	3	158	385-405
93Mb1217	27567		L	astragalus	3	85	540-550
94Mb715	29698		L	astragalus	3	153	420-440
94Mb864	29699		R	astragalus	3	150	418
96Mb3923	33214		R	astragalus	3	169	336
96Mb3958	33216		R	astragalus	3	177	453
96Mb3238	no pg		L	astragalus	3	193	380
92MB619			L	astragalus	3	70	473
93Mb0749				astragalus	3	89	490-500
94Mb200	29600		R	calcaneus	3	LP	395-425 below IPI
92MB701			L	calcaneus	3	71	475
92MB981	25141		L	cubonavicular	3	63	479
93Mb0389	27592		L	cubonavicular	3	82	93
93Mb1039	27591			cubonavicular	3	88	490-500
93Mb0724	27587		L	cuneiform tarsal	3	103	470-480
93Mb1025	27593		L	cuneiform tarsal	3	80	515-525
94Mb872	29702		L	cuneiform tarsal	3	150	390-425 below IPI
94Mb562	29700		R	cuneiform tarsal	3	120	465-485 below IPI
94Mb949	29701		R	cuneiform tarsal	3	152	425-445 below IPI
93Mb0602				MT III/IV	3	101	480-495
92MB1286	25366		L	cuneiform lateral	3	73	480
94Mb266	29594		R	cuneiform lateral	3	123	425-445
97Mb90	36179			metapodial distal	3	79	340-360
88Mb1315	21661			metapodial distal	3	H	436 below PI 1
88Mb685	21885			metapodial distal	3	B	411 below PI 1
97Mb89	36178			metapodial distal	3	179	340
93Mb1224	27597			phalanx proximal	3	86	530-540
92MB702				phalanx proximal	3	62	450
92MB1204	25375			phalanx intermediate	3	70	490
96Mb3668	34199			phalanx intermediate	3	167	415
94Mb263	29704			phalanx distal	3	113	410-430
94Mb733	29705			phalanx distal	3	156	350-370 below IPI
29MB1114			L	phalanx distal	3	78	480
92MB690				phalanx distal	3	66	430
92MB692				phalanx distal	3	66	430
92MB700				phalanx distal	3	61	430
97Mb850	36175			phalanx, distal	3	202	360
97Mb869	36177			phalanx, distal	3	199	380
92MB453				phalanx	3	69	462
Maboko Main - Bed 5w			n=31; MNI=2 based on left astragali
4096/87	20349		L	mand with m3	5w
88Mb940	21459		L	mandible with p3-m2	5w
88Mb1066	21456		L	P (lower)	5w	50	175-185 below PI 1
88Mb1199	21495		R	P (lower)	5w	54	170-200 below P 1
96Mb3689	33772		L	M (lower)	5w	182	200
88Mb1216	21884		L	P2 (upper)	5w	49	185-195 below PI 1
4220/87	20346		R	M2 upper	5w
96Mb1541	34102		L	M (upper)	5w	191	160
88Mb807	21579		L	M (upper)	5w	47	180-190 below PI 1
88Mb812	21524		R	M upper	5w	49	160-170
96Mb741	35034			humerus (distal)	5w	169	135
97Mb248	36183		R	radius distal	5w	95	170-195
88Mb701	21525			ulna proximal	5w	51	195 below PI 1
96Mb828	35036		L	astragalus	5w	185	130
88Mb1035	21455		R	astragalus	5w	49	175-185 below PI 1
88Mb122	21507		L	astragalus	5w	41	150-160 below PI1
88Mb58	21457			cuneifom (tarsus)	5w	43	140-150 below PI 1
88Mb111	21506			cuneiform (tarsus)	5w	44	135-145 below PI1
88Mb112	21503			cuneiform (tarsus)	5w	44	135-145 below PI1
88Mb62				cuneiform	5w	44	125-135 below PI 1
3917/87	21596		proximal phalanx	Phalanx proximal	5w	1,4	whiteclay
4030/87	21654		phalanx proximal prx frag	Phalanx proximal frag	5w	6	whiteclay
97Mb97	36171			phalanx intermediate	5w	195	135-145
93Mb243	27578			Phalanx distal	5w	118	140-150
3859/87	21601			phalanx distal	5w
Maboko Main - Bed 5b			N=49; MNI=3 based on upper left P2 and right P4s
96Mb1755	no number on sheets		R	mandible, with m2-m3	5b	182	288
97Mb298	36167			mandible with m1	5b	197	280-310
96Mb842	34101		L	maxilla fragment, with M	5b	171	215
96Mb824	34204			p3-m3 (lower)	5b	163	230
96Mb3960	33217		L	pm (lower)	5b	182	285
97Mb274	36320		L	m1 lower	5b	197	280-310
96Mb1932	34203		L	m (lower)	5b	171	270
96Mb3493	34201		R	m (lower)	5b	187	279
96Mb707	34039		R	m (lower)	5b	169	240
96Mb874	34236		R	m (lower)	5b	170	260
96Mb875	34202		L	m (lower)	5b	170	260
97Mb221	36165		L	m (lower)	5b	198	275-300
97Mb158	36154		R	dpx upper	5b	198	275-295
97Mb278	36153		R	dpx upper	5b	197	280-310
97Mb412	36151		R	dpx upper	5b	197	294
97Mb432	36157		L	dpx upper	5b	197	295
97Mb544	36155		R	dpx upper	5b	197	299
97Mb606	36159		L	dpx upper	5b	198	275-300
97Mb613	36156		L	dpx upper	5b	198	275-300
96Mb2433	35042		L	P2 (upper)	5b	180	265
96Mb2495	35043		L	P2 (upper)	5b	181	270
97Mb190	36161		L	P2 upper	5b	197	292
96Mb2693	35040		R	P3 (upper)	5b	182	270
96Mb3299	35028		R	P3 (upper)	5b	182	280
96Mb1322	35038		L	P4 (upper)	5b	171	235
96Mb2102	35041		R	P4 (upper)	5b	182	280
96Mb2225	35039			P4 (upper)	5b	171	275
96Mb3737	35027		R	P4 (upper)	5b	182	285
97Mb392	36164		R	P4 upper	5b	197	285
96Mb2439	35049			P (upper)	5b	180	265
96Mb3797	35023		R	P (upper)	5b	181	275
97Mb450	36166		R	M 1 or 2	5b	198	290
96Mb2080	34197		L	M (upper)	5b	182	280
96Mb3861	34198		L	M (upper)	5b	181	275
96Mb3729	34103		R	M (upper)	5b	181	250
97Mb734	36158		L	dpx	5b	197	280-310
96Mb2487	35033			pisiform	5b	181	270
88Mb1293	21445		R	astragalus	5b	47	205 below PI 1
96Mb3941	33215		R	astragalus	5b	179	278
96Mb3608	34037		L	calcaneus	5b	163	250
97Mb413	36185			navicular	5b	197	294
96Mb827	35037			MT 3/4	5b	168	240
97Mb277	36168			phalanx prox	5b	197	280-310
97Mb551	36169			phalanx prox	5b	197	293
97Mb156	36170			phalanx intermediate	5b	198	275-295
97Mb251	36172			phalanx intermediate	5b	198	280
97Mb414	36173			phalanx intermediate	5b	197	293
97Mb664	36174			phalanx intermediate	5b	197	280-310
97Mb619	36176			phalanx distal	5b	197	280-310
Maboko Main surface (Beds 3 or 5)					n=40
94Mb327	29707			horn core		surface of Pit 151
253/84	20292			m3 in mandible		owens trench
96Mb742	35046		R	p3 (lower)	5	176	surface
92Mb271	25493		L	m1 lower		surface
3930/87	20348		R	m2 lower
96Mb3554	34041		R	m3 lower		surface
96Mb749	34200		R	m (lower)	5	179	surface
3930/87	20348		R	m lower
1665'83	13830			m frag lower		Main South
85/84	20290			m frag lower		owens trench
254/84	20293		R	P3 upper		owens trench
96Mb743	35045		L	P4 upper		SURFACE
94Mb51	29570			M upper		surface of pit 125
1716'83	13829			M upper		Main South
94Mb41	29579			P		surface of pit 141
96Mb744	34040			M	s	176	surface
97Mb38	36182		R	humerus, distal	s	197	surface
97Mb22	36184			radius distal	5	196	surface
93Mb93	27586		R	lunate		srface of pit 85
88Mb30	21454			scaphoid	s	46	topsoil
93Mb64	27579		L	scaphoid		surface of pit 82
92MB90	25142		L	unciform	3	61	topsoil
88Mb31	21453		L	astragalus	s	46	topsoil
92Mb21	25378		R	astragalus		surface
264'84	20288		R	astragalus		owens trench
Mb79'84	20289		L	astragalus		owens trench
92MB64	25145		R	cuneiform tarsal	3	61	topsoil
96Mb839	35032			cuneiform tarsal	s	177	surface
256 94	20287		R	cubonavicular		owens trench
310'82	19513			cubonavicular
93 Mb 48	27580		L	cubonavicular		surface of pi 88
96Mb748	35035			metapodial (distal)	s	173	surface
97Mb45	36180			metapodial distal	5	surface
3843/87	21602			phalanx prox		surface Main
1662'83	13831			Phalanx proximal	Main South
	13832			Phalanx proximal	Main South
Maboko Southeast - Bed 12					n=9
92MB248	25352			horncore	12
88Mb1169	21658		R	maxilla w/DP4-M2	12		surface
94Mb95				m lower	12
92MB249	25363		R	M (upper)	12		surface
92MB15	25063			M (upper)	12		surface
96Mb747	34038		R	m3 (lower)	12		surface
94Mb5	29703			phalanx proximal	12		surface
Maboko East
5586/88	20340		L	M upper	15	Bed 15
List from Pre-excavation catalogue
120'7	934			horn core
locality 00063?
Mb27	7878			astragalus
Mb40	7879			Metapodial frag
locality 00064 MB E
Mb29	7880			M upper
Mb37	7882			Mandible with m2
Maboko - no other details
Mb1437'82	10060			horn core frag
1294'82	10321			mandible with teeth
326'82	10299			dp
85'82	10301			I
1412'82	10302			I
1139'82	10311			I
1170'82	13012			I
1167'82	10296			M
197'82	10297			M
211'82	10298			M
1180'82	10313			M
526'82	10295			M
665'82	10323			p3 lower
240'82	10322			p4 lower
1037'82	10300			P
M+427:442b78	8036			P
1315/82	10281			tooth frag
1316'82	10282			tooth frag
1191'82	10314			tooth frag
365'82	10329			tooth frag
1350'82	10280			astragalus
520'82	10324			astragalus
1173'82	10328			Femur head
422'82	10283			Metapodial frag
396'82	10284			Metapodial frag
341'82	10325			Metapodial frag
529'82	10293			Phalanx
1194'82	10294			Phalanx
1260'82	10308			Phalanx
1197'82	10310			Phalanx
126'82	10315			Phalanx frag
1038/82	10279			Phalanx terminal

## Sheet: B-teeth
Table 2. Measurements of the main dental elements. L=mesiodistal length, W=maximum bucco-lingual width, Hyp=metaconid H/L for m1 and 2, and Metaconid H/W for m3. When two Hyp values are given the former is for m2 and the latter for m3. Upper dentition in bold.
accession #	Bed
LOWER TEETH
		Tentative attribution	p2	p3	m1		m2		m3		m1-3	p2-p4	Hyp
			L	L	L	W	L	W	L	W	L
KNM-MB 548		?			11.1	5.5	13.5	6.8	17	6.8
KNM-MB 7882		T. africanus			10	6.5							0.8
KNM-MB 9204		T. africanus			9.7	6.9	10.8	6.5	14.7	6.5	33.3	c. 22.1
KNM-MB 13828		T. africanus							16
KNM-MB 20342		T. africanus					12.6	8.4
KNM-MB 20349	5w	T. africanus							14.6	6.9
KNM-MB 20350	5w	T. africanus			9.6	6.3	11	6.7	14.3	7	35	c. 20.5	0.84/1.26
KNM-MB 20921		T. africanus							14.7
KNM-MB 21459	5w	T. africanus			9.9	7	10.5	7.4			c. 35	22.4	0.75
KNM-MB 21666	3	K. pickfordi							18.7	5.6			/2.52
KNM-MB 21912	3	K. pickfordi							c. 19	7.5
KNM-MB 21917		T. africanus		8.8
KNM-MB 24923	3	T. africanus					11.6	6.7
KNM-MB 24924		T. africanus			10.3
KNM-MB 24925		T. africanus			11.5
KNM-MB 24927	3	T. africanus			10	5.9
KNM-MB 24928	3	T. africanus					11.9	7.2
KNM-MB 24929	3	T. africanus					11.9
KNM-MB 25148	12	K. pickfordi			13.6	8.6	14.6	9.2	c. 20		c. 46	c. 30
KNM-MB 25490	12	T. africanus							15.3	6.8
KNM-MB 29588		K. pickfordi					13.4
KNM-MB 29589	3	K. pickfordi					12.8	8.5
KNM-MB 32360		T. africanus					11.1	6.9					0.88
KNM-MB 34041		K. pickfordi							18.5
KNM-MB 34200		T. africanus					11.1	7.1					0.81
KNM-MB 34201	5b	T. africanus			8.7	5.9
KNM-MB 34202	5b	T. africanus			10.4	6.9
KNM-MB 34203	5b	T. africanus			10.1	6.3
KNM-MB 34204	5b	T. africanus			9.2	6.4	11	6.7	14.5	7	c. 34.7
KNM-MB 34236		T. africanus					11.7	7.1
KNM-MB 34487	3	T. africanus					12	7.6					0.92
KNM-MB 35022	5w	T. africanus							14.8
KNM-MB 37365	3	T. africanus					12.3	6.8					0.9
KNM-MB 35331		T. africanus							13.8	6.5	33
UPPER TEETH
			P2	P3	M1		M2		M3		M1-M3
			L	L	L	W	L	W	L	W	L
KNM-MB 9204		T. africanus			9.4	10.8	10.7	12.3	10.3	11.2	29.8
KNM-MB 10296		T. africanus			10	10.1
KNM-MB 13829		T. africanus					11.6
KNM-MB 21536	3	K. pickfordi							13.5	12.5
KNM-MB 29573	3	K. pickfordi							c. 16.1		35
KNM-MB 34036	5b	T. africanus			10.2	11.2
KNM-MB 34197	5b	T. africanus			10.7	12
KNM-MB 34199	3	K. pickfordi					12.5	11.2
KNM-MB 34446			6.5
KNM-MB 34447				6.8

## Sheet: C-molar plots
Bivariate plot of lower molar mesio-distal Length (L) and maximum bucco-lingual width (W) for specimens in mandibles and isolated teeth that are tentatively assigned to element based on the range of dimensions for molars in mandibles.
#	site	taxon	m1		m2		m3		bed
			L	W	L	W	L	W
			K. pickfordi Maboko	K. pickfordi Maboko	K. pickfordi Maboko	K. pickfordi Maboko	K. pickfordi Maboko	K. pickfordi Maboko	N. pickfordi Maboko
MB 21666	Maboko	K. pickfordi					18.7	5.6	3
MB 21912	Maboko	K. pickfordi					19	7.5	3
MB 25148	Maboko	K. pickfordi	13.6	8.6	14.6	9.2	20		12
MB 29589	Maboko	K. pickfordi			12.8	8.5			3
			T. africanus Maboko	T. africanus Maboko	T. africanus Maboko	T. africanus Maboko	T. africanus Maboko	T. africanus Maboko
MB 548	Maboko	T. africanus	11.1	5.5	13.5	6.8
MB 7882	Maboko	T. africanus	10	6.5
MB 9204	Maboko	T. africanus	9.7	6.9	10.8	6.5	14.7	6.5
MB 20342	Maboko	T. africanus			12.6	8.4
MB 20349	Maboko	T. africanus					14.6	6.9	5w
MB 20350	Maboko	T. africanus	9.6	6.3	11	6.7	14.3	7	5w
MB 21459	Maboko	T. africanus	9.9	7	10.5	7.4			5w
MB 24923	Maboko	T. africanus			11.6	6.7			3
MB 24927	Maboko	T. africanus	10	5.9					3
MB 24928	Maboko	T. africanus			11.9	7.2			3
MB 25490	Maboko	T. africanus					15.3	6.8	12
MB 32360	Maboko	T. africanus			11.1	6.9
MB 34200	Maboko	T. africanus			11.1	7.1
MB 34201	Maboko	T. africanus	8.7	5.9					5b
MB 34202	Maboko	T. africanus	10.4	6.9					5b
MB 34203	Maboko	T. africanus	10.1	6.3					5b
MB 34204	Maboko	T. africanus	9.2	6.4	11	6.7	14.5	7	5b
MB 34236	Maboko	T. africanus			11.7	7.1
MB 34487	Maboko	T. africanus			12	7.6			3
MB 35331	Maboko	T. africanus					13.8	6.5
MB 37365	Maboko	T. africanus			12.3	6.8			3
			N. gariepensis Arrisdrift	N. gariepensis Arrisdrift	N. gariepensis Arrisdrift	N. gariepensis Arrisdrift	N. gariepensis Arrisdrift	N. gariepensis Arrisdrift
pq105	Arrisdrift	N. gariepensis			9.7	6.5	13.3	6.3
pq106	Arrisdrift	N. gariepensis	9	6.1	9.9	6.5
pq2706	Arrisdrift	N. gariepensis	8.9	5.8	9.5	6.1	13.6	5.6
pq2500	Arrisdrift	N. gariepensis	8.3	5.5	9.5	5.5
pq2220	Arrisdrift	N. gariepensis			9.1	6.1	13.5	6.1
pq3090	Arrisdrift	N. gariepensis			8.6	5.6	12.5	5
228'95	Arrisdrift	N. gariepensis	8.1	5.5	9.4	6	13.6	6
169'95	Arrisdrift	N. gariepensis	9	5.4
550'95	Arrisdrift	N. gariepensis			9.6	6.1	13.9	5.7
273'95	Arrisdrift	N. gariepensis			9.7	6.1	14.3	6
68'96	Arrisdrift	N. gariepensis	8.7	5.5	10.1	6
30'97	Arrisdrift	N. gariepensis	8.2	5.5	9.4	6	13.5	6
425'97	Arrisdrift	N. gariepensis					13.4	6.5
426'97	Arrisdrift	N. gariepensis			8	6.2	13	6.5
427'97	Arrisdrift	N. gariepensis	8.6	5.9	9	6.1	13.3	6.2
27'98	Arrisdrift	N. gariepensis	9.2	5.9	9.9	6.3	13.8	5.7
189'98	Arrisdrift	N. gariepensis	7.9	5.7	9.8	6.5	14	6.2
188'98	Arrisdrift	N. gariepensis	9	5.7	10	6.5	15.3	6.2
299'98	Arrisdrift	N. gariepensis	8.1	5.5	8.5		13.4	5.4
433'98	Arrisdrift	N. gariepensis	7.9	5.8	10.1	6.2	13.5	6.1
436'98	Arrisdrift	N. gariepensis	8.6	5.5	9.8	6.9
692'98	Arrisdrift	N. gariepensis					14	6
585'99	Arrisdrift	N. gariepensis	7.4	5.4	9.2	5.7	13.7	5.5
773'99	Arrisdrift	N. gariepensis			10.9	6.5
196'99	Arrisdrift	N. gariepensis	8.5	5.1
			H. tanyceras Fort Ternan	H. tanyceras Fort Ternan	H. tanyceras Fort Ternan	H. tanyceras Fort Ternan	H. tanyceras Fort Ternan	H. tanyceras Fort Ternan
165	Fort Ternan	H. tanyceras			15	9.6
			E. lampangensis Mae Moh	E. lampangensis Mae Moh	E. lampangensis Mae Moh	E. lampangensis Mae Moh	E. lampangensis Mae Moh	E. lampangensis Mae Moh
62	Mae Moh	E. lampangensis	11.5	7.6
63	Mae Moh	E. lampangensis	11.5	8.07
64	Mae Moh	E. lampangensis	11.6	7.3
66	Mae Moh	E. lampangensis	12.1	7.7
73	Mae Moh	E. lampangensis			12.6	9.2
74	Mae Moh	E. lampangensis					17.25	8.2
67	Mae Moh	E. lampangensis					17.1	8.45
			T. halamagaiensis Xishuigou	T. halamagaiensis Xishuigou	T. halamagaiensis Xishuigou	T. halamagaiensis Xishuigou	T. halamagaiensis Xishuigou	T. halamagaiensis Xishuigou
V25523.3	Xishuigou	T. halamagaiensis	9.6	8.4	11.2	7.2	16.5
V25523.4	Xishuigou	T. halamagaiensis			12.1	7.9		7.9
8599	Xishuigou	T. halamagaiensis	10.4	6.7	13.2	6.2	17.7	6.5
V25523.2	Xishuigou	T. halamagaiensis
			E. clavatus Sansan, mean	E. clavatus Sansan, mean	E. clavatus Sansan, mean	E. clavatus Sansan, mean	E. clavatus Sansan, mean	E. clavatus Sansan, mean
	Sansan	E. clavatus	11.7	8.2	13.6	9.2	18.5	8.5
			T. gracilis Çandır, mean	T. gracilis Çandır, mean	T. gracilis Çandır, mean	T. gracilis Çandır, mean	T. gracilis Çandır, mean	T. gracilis Çandır, mean
	Çandır	T. gracilis	9.6	7	11.7	7.6	17.2	7.5

## Sheet: D-PmM plots
Bivariate plot of Maboko bovid molar Length length (Lm1-m3) versus Width premolar length (Wp2-p4) compared to samples from other Miocene species. Comparative data from Gentry (1970), Morales and Pickford (2003), Made (2012) and from Li et al., (2021a).
site	#	m1-m3	p2-p4
			T. africanus MB 9204
Maboko	9204	33.3	22.1
			T. africanus MB 5w
Maboko	20350	35	20.5
Maboko	21459	35	22.4
			T. gracilis Çandır
Çandır	92-88	34	20.7
Çandır	91-160	34	20.7
Çandır	92-98	35	20.7
Çandır	A-98	35	20.7
Çandır	loc 3	37	20.5
Çandır	surf.Loc.3	37	20.5
Çandır	92-88	37.7	20.6
Çandır	A-88	37.7	20.6
Çandır		38.2	22
Çandır	90-47	38.6	25.5
Çandır	91-160	38.6	25.5
Çandır		38.7	23
Çandır		39.5	24
Çandır		39.5	26
Çandır		39.7	22
Çandır	92-20	41.2	25.3
Çandır		41.8	23.4
			T. gracilis Inönü
Inönü	AKI 3/56	39.5	21.3
			T. kekemaidengensis Fuhai
Duolebulejin, Fuhai		46.5	26
			T. grangeri Tunggur
Tunggur	AMNH-26516	57	29
			T. noverca Tunggur
Tunggur	AMNH-26515	44.5	22
			T. halamagaiensis Xishuigou
Xishuigou	V25523.2	36.5	22.5
			K. pickfordi MB 25148
Maboko		46	30
			K. pickfordi Nyakach
Nyakach	NC 7816	47.4	30.5
			K. gaopoensis Chios
Chios	THB 21	46.3	24.5
			N. gariepensis Arrisdrift
Arrisdrift	pq105	30	22.2
Arrisdrift	228'95	31.6	21.2
Arrisdrift	30'97	31	20.5
Arrisdrift	426'97	31.3	21.8
Arrisdrift	427'97	30.5	21.7
Arrisdrift	188'98	35.5	22.3
Arrisdrift	299'98	30.8	22.2
Arrisdrift	585'99	30.5	21.3
			Gazella Fort Ternan mean
Fort Ternan		36.8	23.1
			Kip. labidotus Fort Ternan mean
Fort Ternan		45.1	26.8
			H. tanyceras Fort Ternan
Fort Ternan		50	19.3
Fort Ternan		51	22.3
Fort Ternan		51.4	23.3
Fort Ternan		52.9	24.1
			E. clavatus Sansan
Sansan		43	27.5
Sansan		41	29
Sansan		48	34.3
Sansan		45	34
Sansan		41	31.5
Sansan		46	32
Sansan		42	30
Sansan		41	30
Sansan		42	32
Sansan		43	32
Sansan		44	30.5

## Sheet: E-Maboko molars
#	taxon	L x W lower molars
		T. africanus 20350	T. africanus 20350
KNM-MB 20350	T. africanus	9.6	6.3
		11	6.7
		14.3	7
		T. africanus 9204	T. africanus 9204
KNM-MB 9204	T. africanus	9.7	6.9
		10.8	6.5
		14.7	6.5
		T. africanus 34204	T. africanus 34204
KNM-MB 34204	T. africanus	9.2	6.4
		11	6.7
		14.5	7
		MB 548	MB 548
KNM-MB 548	?	11.1	5.5
		13.5	6.8
		17	6.8
		T. africanus 21459	T. africanus 21459
KNM-MB 21459	T. africanus	9.9	7
		10.5	7.4
		K. pickfordi 25148	K. pickfordi 25148
KNM-MB 25148	K. pickfordi	13.6	8.6
		14.6	9.2
		20
			m1
KNM-MB 24927	T. africanus	10	5.9
KNM-MB 34201	T. africanus	8.7	5.9
KNM-MB 34202	T. africanus	10.4	6.9
KNM-MB 34203	T. africanus	10.1	6.3
KNM-MB 7882	T. africanus	10	6.5
			m2
KNM-MB 29589	K. pickfordi	12.8	8.5
KNM-MB 32360	T. africanus	11.1	6.9
KNM-MB 34200	T. africanus	11.1	7.1
KNM-MB 24928	T. africanus	11.9	7.2
KNM-MB 24923	T. africanus	11.6	6.7
KNM-MB 20342	T. africanus	12.6	8.4
KNM-MB 34236	T. africanus	11.7	7.1
KNM-MB 34487	T. africanus	12	7.6
KNM-MB 37365	T. africanus	12.3	6.8
			m3
KNM-MB 20349	T. africanus	14.6	6.9
KNM-MB 21666	K. pickfordi	18.7	5.6
KNM-MB 21912	K. pickfordi	19	7.5
KNM-MB 25490	T. africanus	15.3	6.8
KNM-MB 35331	T. africanus	13.8	6.5

## Sheet: F-horncores
	Accession #	Bed	Taxon	APD	TD	APD/TD
	KNM-MB 13827	Main	Genus indet.	41	25	1.64
	KNM-MB 27602	3	Turcocerus africanus	30.7	20.8	1.48
	KNM-MB 24892	3	Turcocerus africanus	30	22.1	1.36
	KNM-MB 27603	3	Turcocerus africanus	29.5	22	1.34
	KNM-MB 27599	3	Turcocerus africanus	28.3	21.7	1.3
	KNM-MB 33211	3	Turcocerus africanus	28	20.3	1.38
	KNM-MB 10061		Turcocerus africanus	27.5	20.5	1.34
	KNM-MB 20351	5w	Turcocerus africanus	27.3	17.2	1.59
	KNM-MB 20347	Main	Turcocerus africanus	26	17	1.53
	KNM-MB 21504	5w	Turcocerus africanus	25.9	20.6	1.26
	KNM-MB 27601	3	Turcocerus africanus	25	17.5	1.42
	KNM-MB 36684	3	Turcocerus africanus	25	19	1.32
	KNM-MB 29562	5w	Turcocerus africanus	23.3	17.3	1.35
	NHMUK M 15544		Turcocerus africanus	23.1	17.2	1.34
	KNM-MB 21849	3	Kubanotragus pickfordi	25.5	18.5	1.38
	KNM-MB 35021	3	Kubanotragus pickfordi	22.7	18.6	1.22
	NHMUK M 15543right		Kubanotragus pickfordi	20	18.3	1.09
	NHMUK M 15543left		Kubanotragus pickfordi	20	17.5	1.14

## Sheet: G-HC plots
Bivariate plot of middle Miocene horncore dimensions. Comparative data from Gentry 1970, Ye et al (1999), Dmitrieva (2007), Morales & Pickford (2003) and Li et al. (2021a)
		A-P diameter	transverse diameter	Length
			T. africanus MB
T. africanus MB	20347	26	17
T. africanus MB	33211	28	20.3
T. africanus MB	10061	27.5	20.5
T. africanus MB	M 15544	23.1	17.2
			T. africanus MB 3
T. africanus MB 3	27599	28.3	21.7	110
T. africanus MB 3	27601	25	17.5
T. africanus MB 3	27602	30.7	20.8
T. africanus MB 3	27603	29.5	22
T. africanus MB 3	36684	25	19
T. africanus MB 3	24892	30	22.1	80
			T. africanus MB 5w
T. africanus MB 5w	20351	27.3	17.2
T. africanus MB 5w	29562	23.3	17.3
T. africanus MB 5w	21504	25.9	20.6	90
			E. clavatus Sansan (mean)
E. clavatus Sansan (mean)		23.1	16.8
			E. lampangensis Mae Moh
E. lampangensis Mae Moh		18.4	15.8	65
E. lampangensis Mae Moh		15.9	13.6	45
E. lampangensis Mae Moh		17.8	14	50
			Gazella Fort Ternan
Gazella Fort Ternan		22	17.5	92
Gazella Fort Ternan		27	21	92
			K. gaopoensis Gaopo
K. gaopoensis Gaopo		20.7	21.3
K. gaopoensis Gaopo		20.4	22.7
			K. pickfordi MB
K. pickfordi MB 3	21849	25.5	18.5	200
K. pickfordi MB 3	35021	22.7	18.6	162
K. pickfordi MB	M 15543 r	20	18.3
K. pickfordi MB	M 15543 l	20	17.5
			K. sokolovi Belometchetskaya
K. sokolovi Belometchetskaya		18.5	14
K. sokolovi Belometchetskaya		19	16
K. sokolovi Belometchetskaya		20	15.5
			N. gariepensis Arrisdrift
N. gariepensis Arrisdrift	491'99	13.2	10.5	21.8
N. gariepensis Arrisdrift	439'98	12.6	9.9	22.2
			T. gracilis Çandır
T. gracilis Çandır		24.5	23
T. gracilis Çandır		24.2	23
T. gracilis Çandır		23	24
T. gracilis Çandır		27	24
			T. halamagaiensis Xishuigou
T. halamagaiensis Xishuigou	V25523.1	26.7	21.2	82.4
T. halamagaiensis Xishuigou	V8595.1	23.9	21.8	56.1
T. halamagaiensis Xishuigou	V8595.2	17.1	13.7	37.9
T. halamagaiensis Xishuigou	V8595.3	19.1	15.5	54.2
T. halamagaiensis Xishuigou	V8595.4	20.4	16.8	45.3
T. halamagaiensis Xishuigou	V8595.5	19.8	18.8	51.9
			T.kekemaidengensis China, Mongolia
T.kekemaidengensis	3218/216	28.5	24.5
T.kekemaidengensis	2737/417	21	20.5
T.kekemaidengensis	V11811	22.2	20.6

## Sheet: H-Astragalus
MABOKO	MB	medial height	distal width
Maboko	10280	23.8	14.7
Maboko	20288	19.5	11.3
Maboko	20289	18.3	11
Maboko	21445	20.8	12.7
Maboko	21507	21	12.5
Maboko	21546	22.8	14
Maboko	21547	20.7	13.3
Maboko	21587	20.8	12.9
Maboko	25378	28	18.8
Maboko	27567	20.3	12.8
Maboko	29267	21.7	12.8
Maboko	29698	20	12.2
Maboko	29699	22	13.2
Maboko	33214	21.5	14.2
Maboko	33215	20.8	13.2
Maboko	33216	19.3	12.5
Maboko	35025	19.7	11
Maboko	35036	21.5	13.2
Maboko	46382		15.3
Maboko	25146	22.5	14
Maboko	26699	21.9	13.1
Maboko	25388	20.6	12.7
Maboko	27565	21.5	12.8
Maboko	7878	20.9	13.4
Maboko	29697	21.6	12.8
Maboko	NHMUK	28.5	19.3
Maboko	NHMUK	28.8	19.6
Maboko	NHMUK	28	17.5
Maboko	NHMUK	18.9	11.8
Maboko	NHMUK	19.8	12.6

## Sheet: I-abundances
Relative abundances of some taxa in the Maboko main beds and at Fort Ternan, relative to the whole mammalian fauna. Percentages are calculated upon NISP at Maboko, upon MNI at Fort Ternan. Data from Gentry 1970, Shipman et al. 1981; Arney et al., 2022, and our own data.
Taxon	Bed 3	Bed 5b	Bed 5w	Fort Ternan
Bovidae	5.9	1.4	1.8	64.5
Giraffoidea	16	2.5	10	3.7
Tragulidae	9.9	27	14	1.6
Cercopithecoidea	24	40	32.7	0
Hominoidea	6.9	11	2.1	3.7

## Sheet: J-biogeography
Main localities dicussed in the text, roughly arranged by increasing age. N° refers to the numbers in Fig. 12.
locality	country	N°	taxon
Koujiacun	China	43	Turcocerus lishanensis
Kekemaideng	China	39	Turcocerus kekemaidengensis
Tunggur	China	41	Turcocerus grangeri; Turcocerus noverca
Gaopo	China	43	Kubanotragus gaopoensis
Toril 3A	Spain	7	Eotragus sp.
Mae Moh	Thailand	44	Eotragus lampangensis
La Grive	France	14	Eotragus sp.
Çandır	Turkey	30	T. gracilis; Hypsodontus pronaticornis
Manchones	Spain	7	Eotragus sp.
Mordoğan	Turkey	27	Hypsodontus pronaticornis
Ulan Tologoi	Mongolia	37	Turcocerus kekemaidengensis
Sansan	France	12	Eotragus clavatus
Arroyo de Val	Spain	7	Eotragus sp.
Prebreza	Serbia	23	Hypsodontus serbicus
Inönü	Turkey	29	T.gracilis; Kubanotragus sp.; H. pronaticornis
Cheskewala	Pakistan	35	Kubanotragus sokolovi
Göriach	Austria	18	Eotragus cf. clavatus
Veliko Selo	Serbia	22	Eotragus sp.
Paşalar	Turkey	28	Hypsodontus pronaticornis
Belometchetskaya	Russia	33	Kubanotragus sokolovi
Leoben	Austria	19	Pseudoeotragus seegrabensis; Eotragus sp.
Veltheim	Switzerland	17	Eotragus sp.
Labitschberg	Austria	20	Eotragus sp.
Gračanica	Bosnia-Herz.	21	Eotragus sp.
Popovac	Serbia	24	Eotragus sp.
Rimbez	France	13	Eotragus sp.
Nyakach	Kenya	2	Kubanotragus pickfordi; Turcocerus sp.?
Negev	Israel	31	Eotragus sp.
Tarazona	Spain	9	Eotragus sp.
Sainte Maure	France	15	Eotragus clavatus
Maboko	Kenya	1	Kubanotragus pickfordi; Turcocerus africanus
Jebel Zelten	Libya	3	Kubanotragus sp. ?
Montejo	Spain	8	Eotragus sp.
Thymania	Greece	26	Kubanotragus gaopoensis
Botamoyin	China	38	Turcocerus halamagaiensis
Antonios	Greece	25	Eotragus sp.
Arrisdrift	Namibia	4	Namacerus gariepensis
Buñol	Spain	5	Eotragus sp.
Córcoles	Spain	6	Eotragus sp.
Can Canals	Spain	10	Eotragus sp.
Sant Mamet	Spain	11	Eotragus sp.
Savigné	France	15	Eotragus sp.
Ad Dabtiyah	Saudi Arabia	32	Eotragus sp.
Jiulongkou	China	42	Amphimoschus ? jiulongkouensis
Artenay	France	16	Eotragus artenensis
Kamlial	Pakistan	36	Eotragus noyei
Bugti level 6	Pakistan	34	Eotragus minus
Xishuigou	China	40	T. halamagaiensis; Amphimoschus xishuiensis
